# Supplementary material
Source: PubMed Central journal article supplement (PMC6692817)
Supplement: DB181088SupplementaryData.pdf [file DB181088SupplementaryData.pdf]

SUPPLEMENTARY DATA

**The BBSome in POMC and AgRP Neurons is Necessary for Body Weight Regulation and Sorting of Metabolic Receptors**

Deng-Fu Guo<sup>1</sup>, Zhihong Lin<sup>1</sup>, Yuanming Wu<sup>2</sup>, Charles Searby<sup>3</sup>, Daniel R. Thedens<sup>4</sup>, George B. Richerson<sup>2</sup>, Yuriy M. Usachev<sup>1,7</sup>, Justin L. Grobe<sup>1,6,7</sup>, Val C. Sheffield<sup>3,6,7</sup> and Kamal Rahmouni<sup>1,5,6,7,\*</sup>

Department of Pharmacology<sup>1</sup>, Department of Neurology<sup>2</sup>, Department of Pediatrics<sup>3</sup>, Department of Radiology<sup>4</sup>, Department of Internal Medicine<sup>5</sup>, Obesity Education and Research Initiative<sup>6</sup> and Fraternal Order of Eagles Diabetes Research Center<sup>7</sup>, University of Iowa, Iowa City, Iowa

**Short title:** Neuronal BBSome and Energy Homeostasis.

**Contain:**

**Supplemental figures 1-8**

**Supplemental table 1**

**\*Corresponding author:**

Kamal Rahmouni, Ph.D.

Department of Pharmacology

University of Iowa Carver College of Medicine

Iowa City, IA, 52242, USA

e-mail: [kamal-rahmouni@uiowa.edu](mailto:kamal-rahmouni@uiowa.edu)

Tel: 319 353 5256

Fax: 319 353 5350

## SUPPLEMENTARY DATA

**Supplementary Figure S1.** Expression of BBS genes in POMC and AgRP neurons is modulated by energy status. (A-B) In silico reanalysis of available data (ref 23) showing BBS gene expression in POMC and AgRP neurons in fed versus fasted mice (cells obtained from 6 fed mice and 5 fasted mice were used for single-cell RNA sequencing). (C) Co-localization of Bbs1 mRNA and POMC mRNA by RNAscope. \* $P < 0.05$ , vs. the fed group.

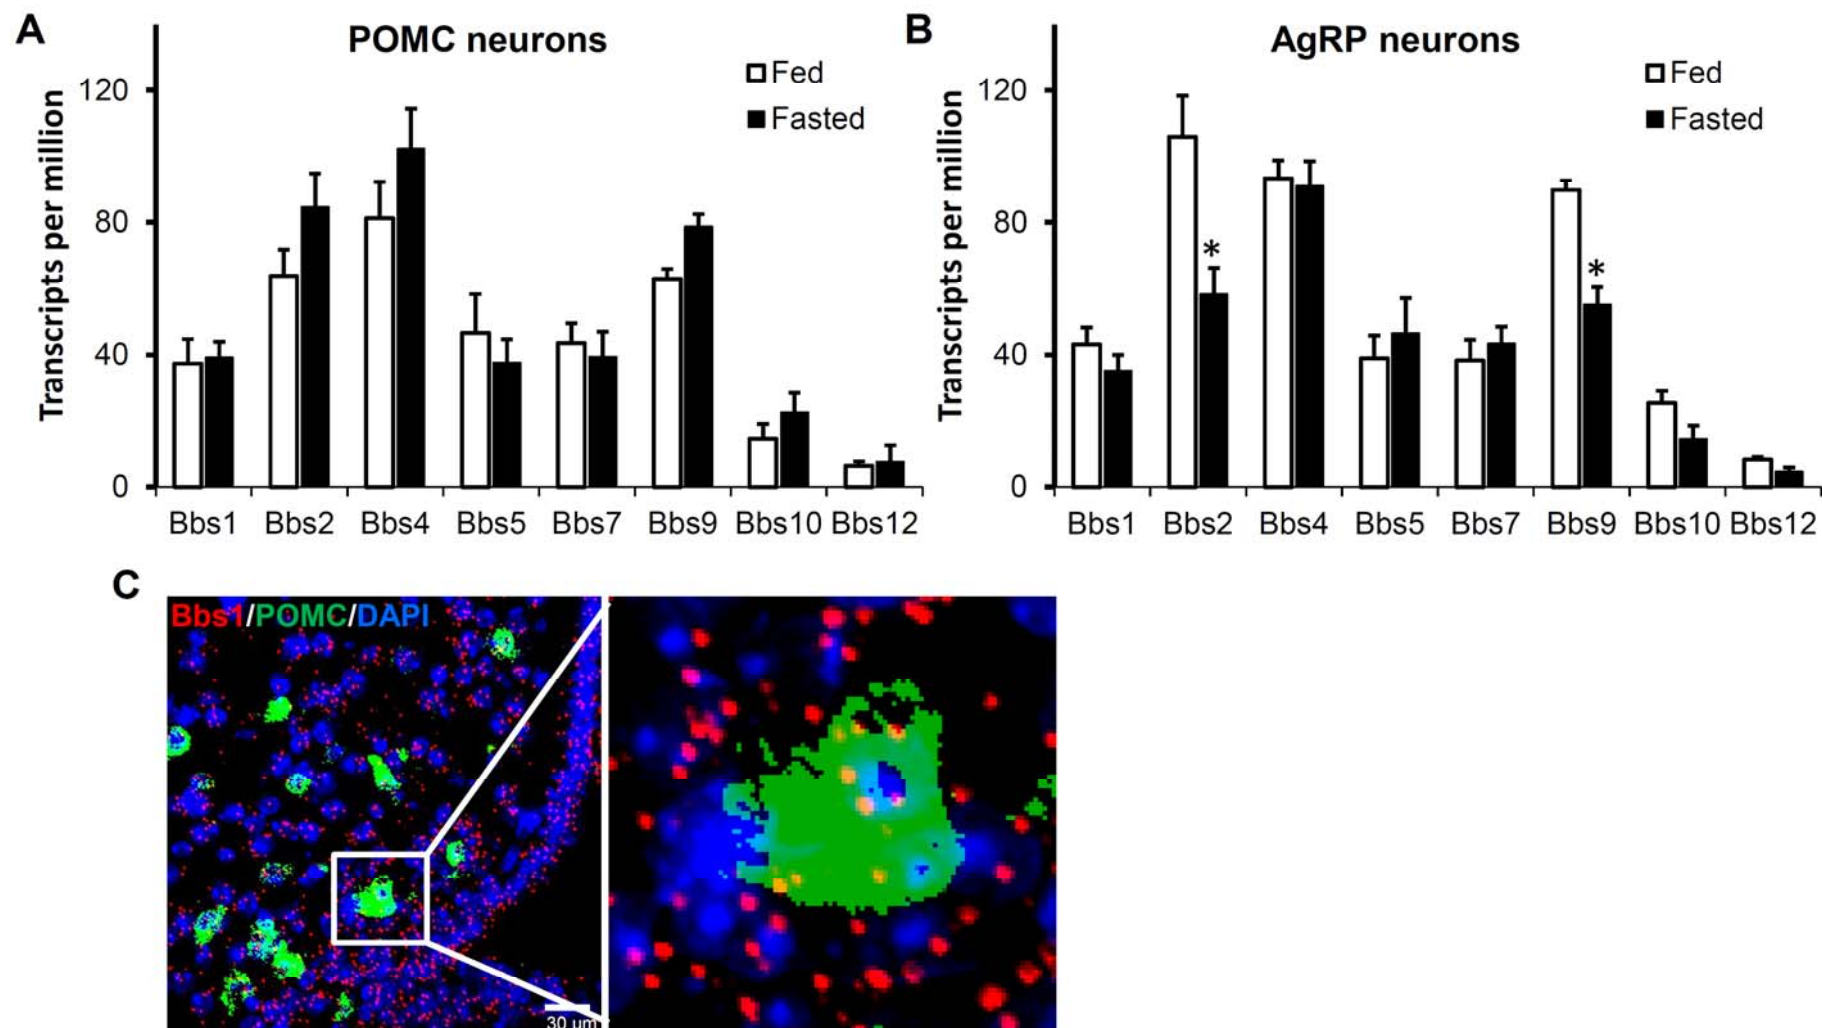

SUPPLEMENTARY DATA

**Supplementary Figure S2.** Evidence of Cre recombinase (presence of td-Tomato) (A) and its co-localization with POMC (B) in the arcuate nucleus of POMC<sup>Cre</sup>/Td-Tomato mice. (C) Intraperitoneal leptin increased p-Stat3 in POMC neurons of control mice, but not POMC<sup>Cre</sup>/Bbs1<sup>fl/fl</sup> mice. (D-E) Weight of fat pads of POMC<sup>Cre</sup>/Bbs1<sup>fl/fl</sup> mice compared to control littermates (n=6-8 per group: 7 males and 7 females for controls and 8 males and 6 females for POMC<sup>Cre</sup>/Bbs1<sup>fl/fl</sup> mice). (F-G) Insulin tolerance test (n=10-12/group: 5 males and 5 females for controls and 6 males and 6 females for POMC<sup>Cre</sup>/Bbs1<sup>fl/fl</sup> mice). BAT: brown adipose tissue, RP: retroperitoneal fat, Ing: inguinal fat, PG: perigonadal fat. \*\*\*P<0.001 and \*\*\*\*P<0.0001 vs. control group.

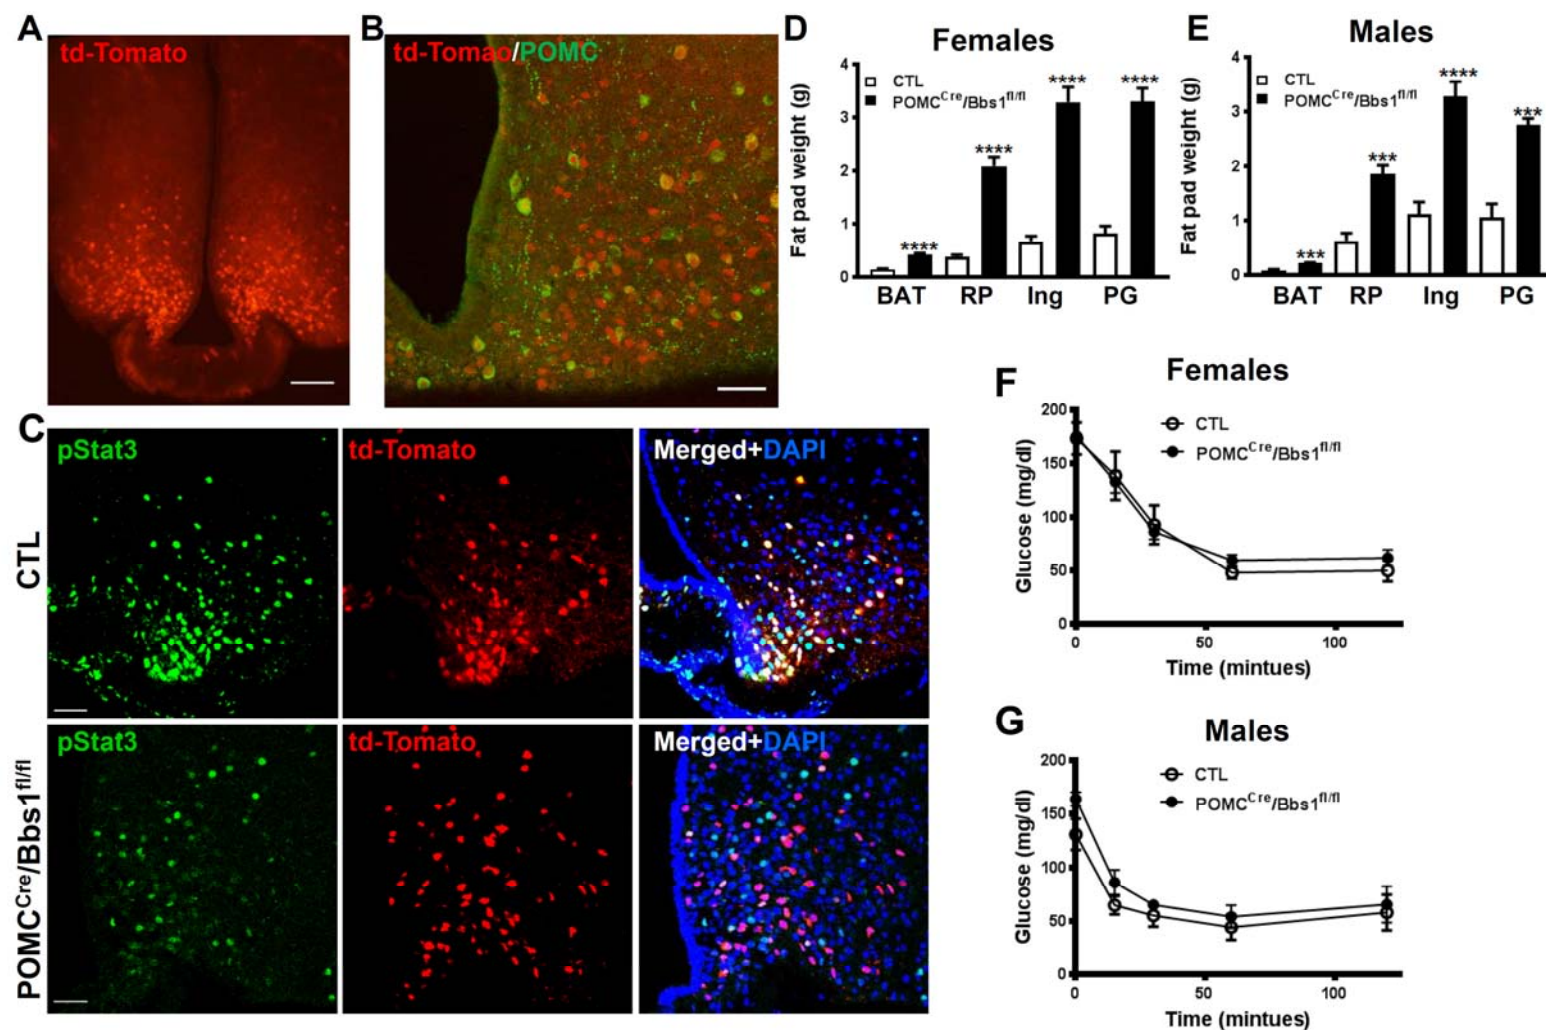

SUPPLEMENTARY DATA

**Supplementary Figure S3.** BBSome disruption in AgRP neurons causes obesity. (A) Evidence of Cre recombinase (presence of td-Tomato) in the arcuate nucleus of the hypothalamus (where AgRP neurons reside) in  $\text{AgRP}^{\text{Cre}}/\text{td-Tomato}$  mice. (B-C) Weight of fat pads in female (B) and male (C)  $\text{AgRP}^{\text{Cre}}/\text{Bbs1}^{\text{fl/fl}}$  mice compared to control littermates (n=6-8 per group: 7 males and 9 females for control and 7 males and 8 females for  $\text{AgRP}^{\text{Cre}}/\text{Bbs1}^{\text{fl/fl}}$  mice). \*\*P< 0.01 and \*\*\*P<0.001 vs. control group. Scale bar: 100  $\mu\text{m}$ .

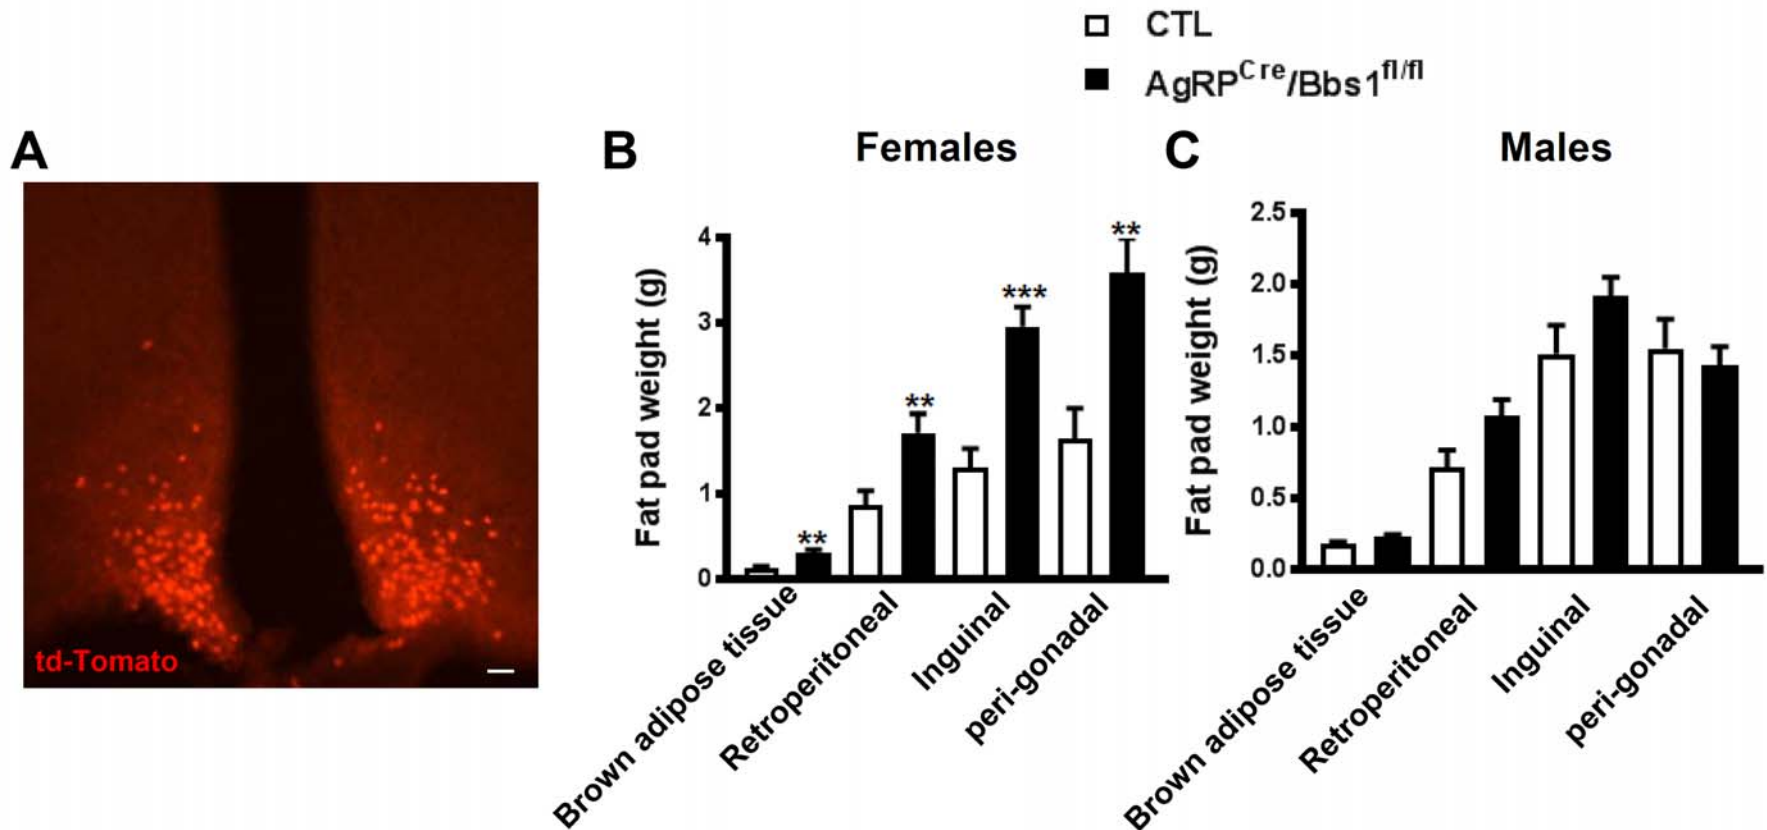

SUPPLEMENTARY DATA

**Supplementary Figure S4.** Validation of 5-HT<sub>2C</sub>R antibody. (A) The anti-5-HT<sub>2C</sub>R antibody detects monomer, dimer and oligomer forms of the Flag-tagged 5-HT<sub>2C</sub>R in HEK 293 cells. (B) Staining with the anti-5-HT<sub>2C</sub>R antibody co-localized with GFP in HEK 293 cells transfected with GFP tagged 5-HT<sub>2C</sub>R (C) The anti-5-HT<sub>2C</sub>R antibody detects the endogenous 5-HT<sub>2C</sub>R in the hypothalamic arcuate nucleus of control mice. This staining is absent in the arcuate nucleus of 5-HT<sub>2C</sub>R knockout mice. Scale bar: 10 μm

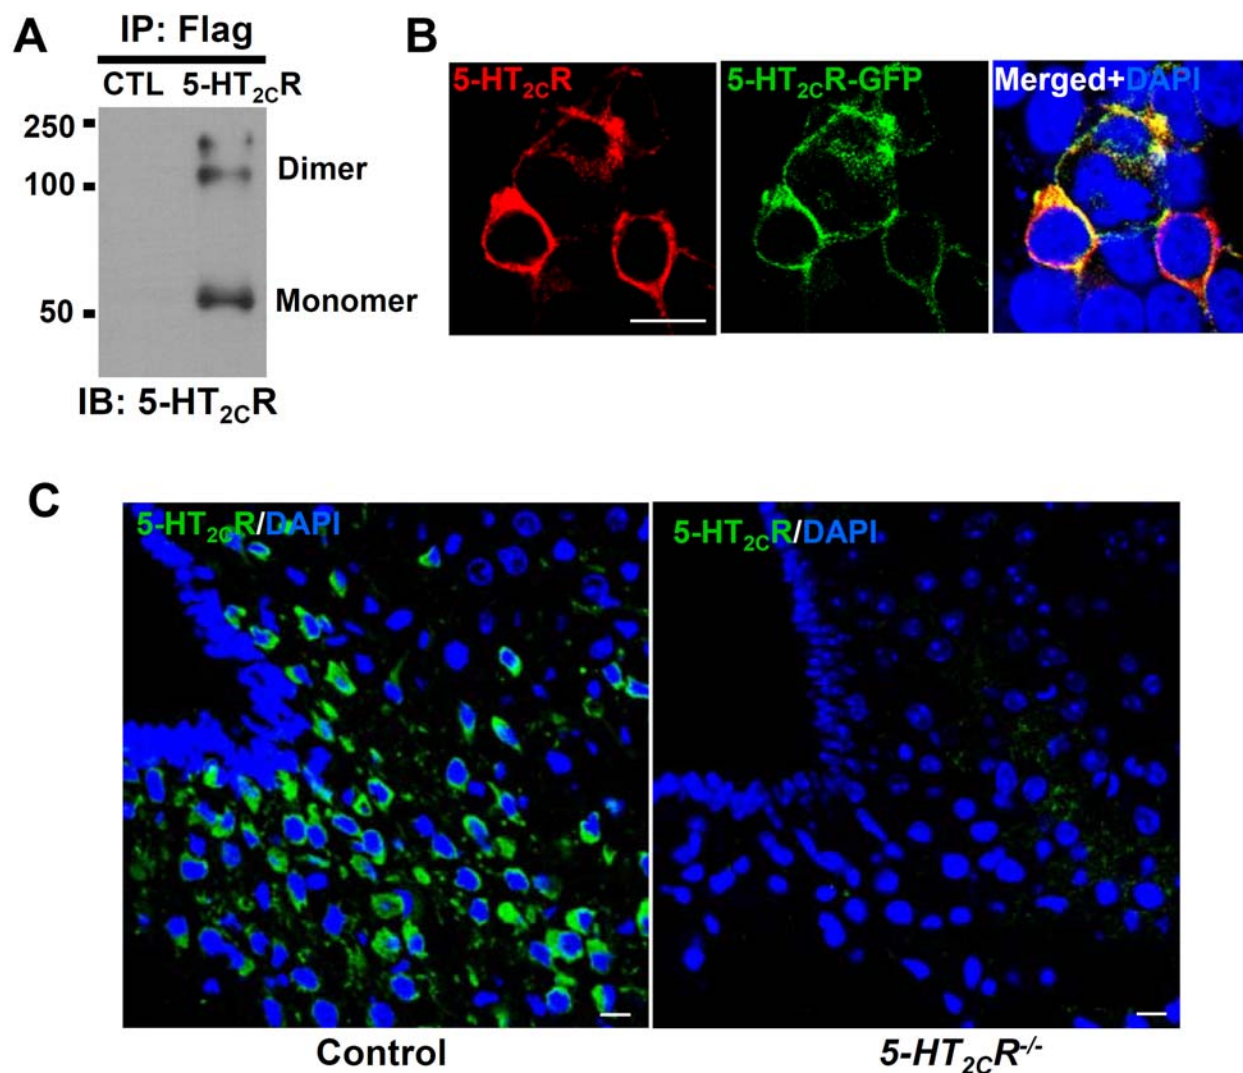

SUPPLEMENTARY DATA

**Supplementary Figure S5.** The BBSome is required for the ciliary localization of NPY<sub>2</sub>R in POMC neurons. (A-B) Loss of NPY<sub>2</sub>R in cilia of td-Tomato<sup>+</sup> (red, arrow head), but not in td-Tomato<sup>-</sup> (non-red, arrow), cells in the arcuate nucleus of POMC<sup>Cre</sup>/Bbs1<sup>fl/fl</sup> mice (n=3) vs controls (n=4). (C) Presence of cilia in td-Tomato<sup>+</sup> (arrow head) and td-Tomato<sup>-</sup> (arrow) cells of POMC<sup>Cre</sup>/Bbs1<sup>fl/fl</sup> mice. \*P<0.05 vs Control. Scale bar: 10 μm.

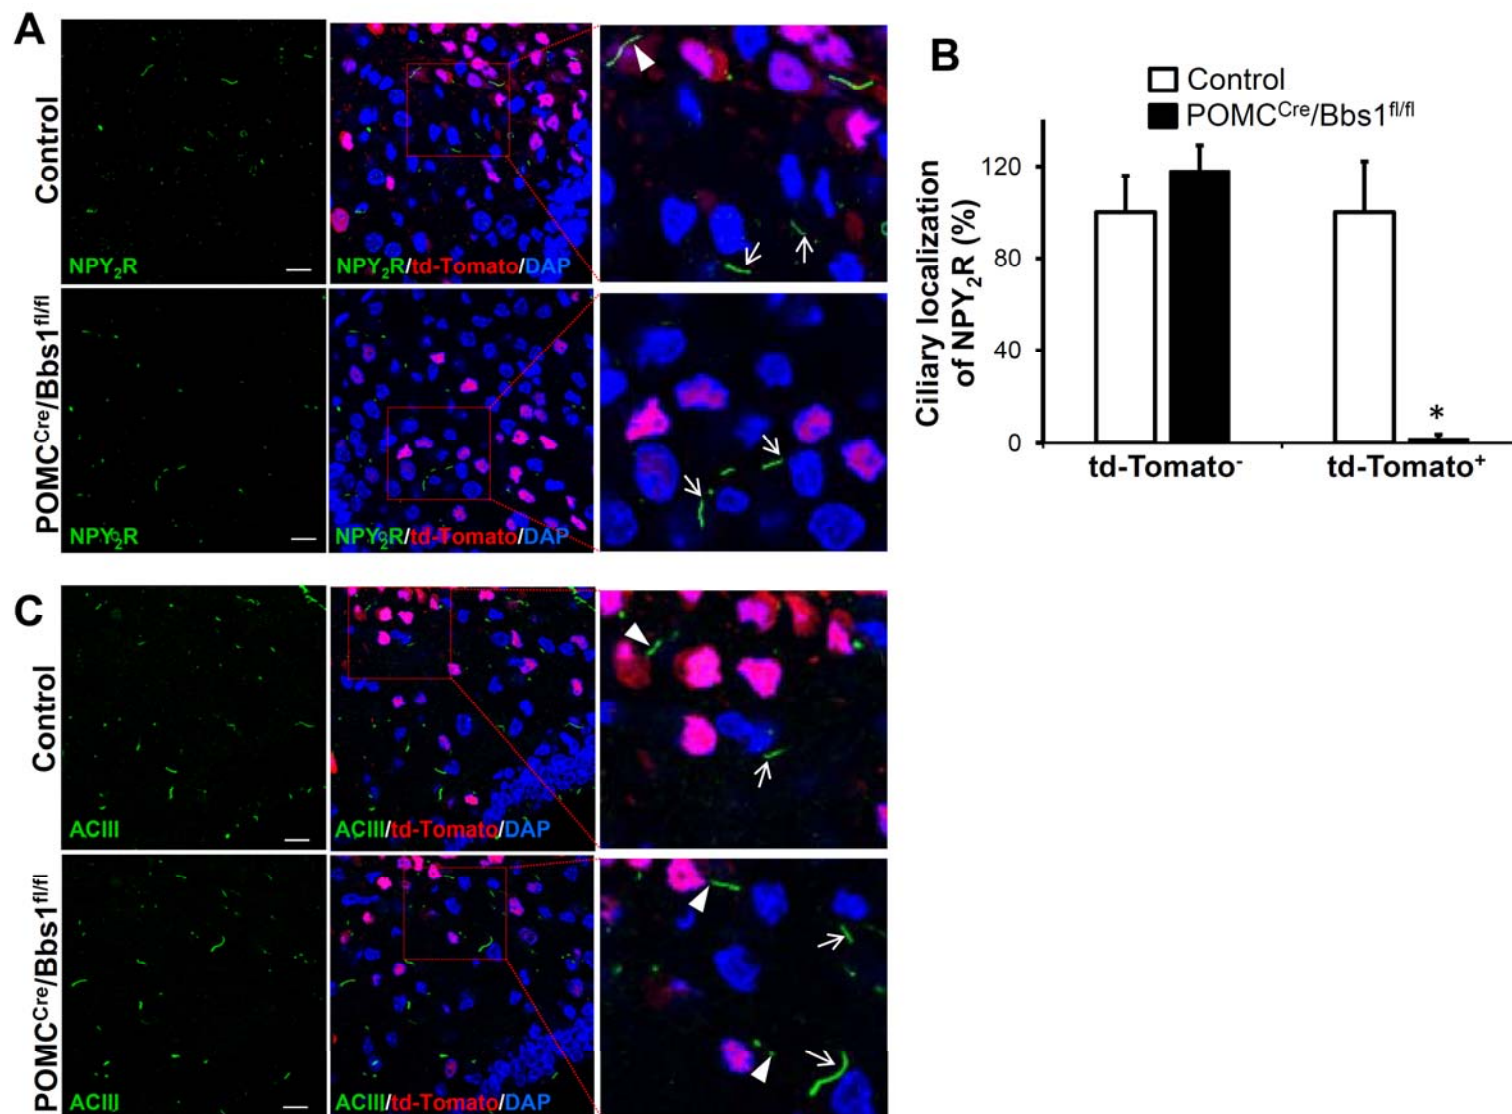

SUPPLEMENTARY DATA

**Supplementary Figure S6.** The BBSome is required for the ciliary localization of NPY<sub>2</sub>R and SSTR<sub>3</sub>. (A-B) Loss of localization in cilia (stained with Acetylated  $\alpha$ -Tub) of NPY<sub>2</sub>R (A) and SSTR<sub>3</sub> (B) in IMCD3-*Bbs1*<sup>-/-</sup> cells. Scale bar: 10  $\mu$ m.

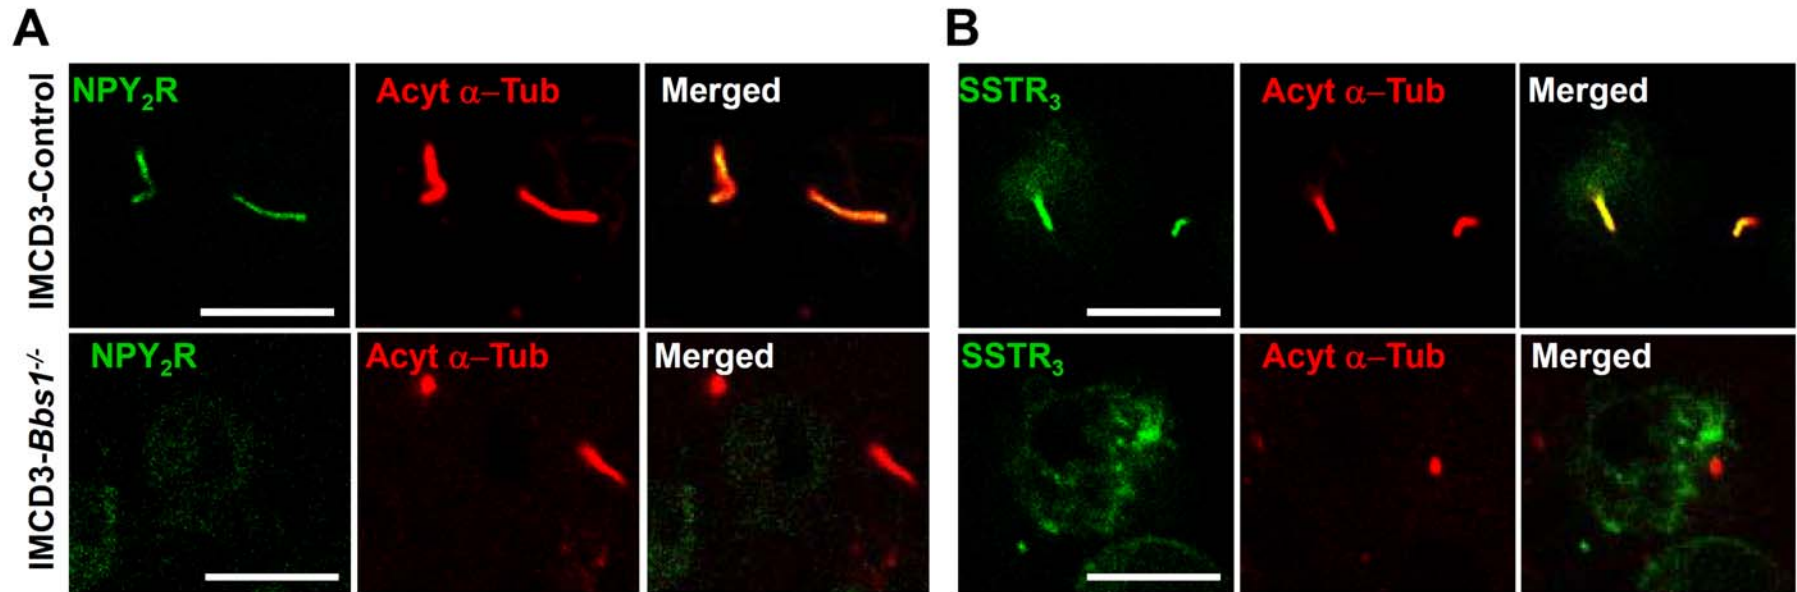

SUPPLEMENTARY DATA

**Supplementary Figure S7.** Representative tracings showing reduced  $[Ca^{2+}]_i$  response to leptin in control and  $Bbs1^{-/-}$  IMCD3 cells stably expressing the LepRb.

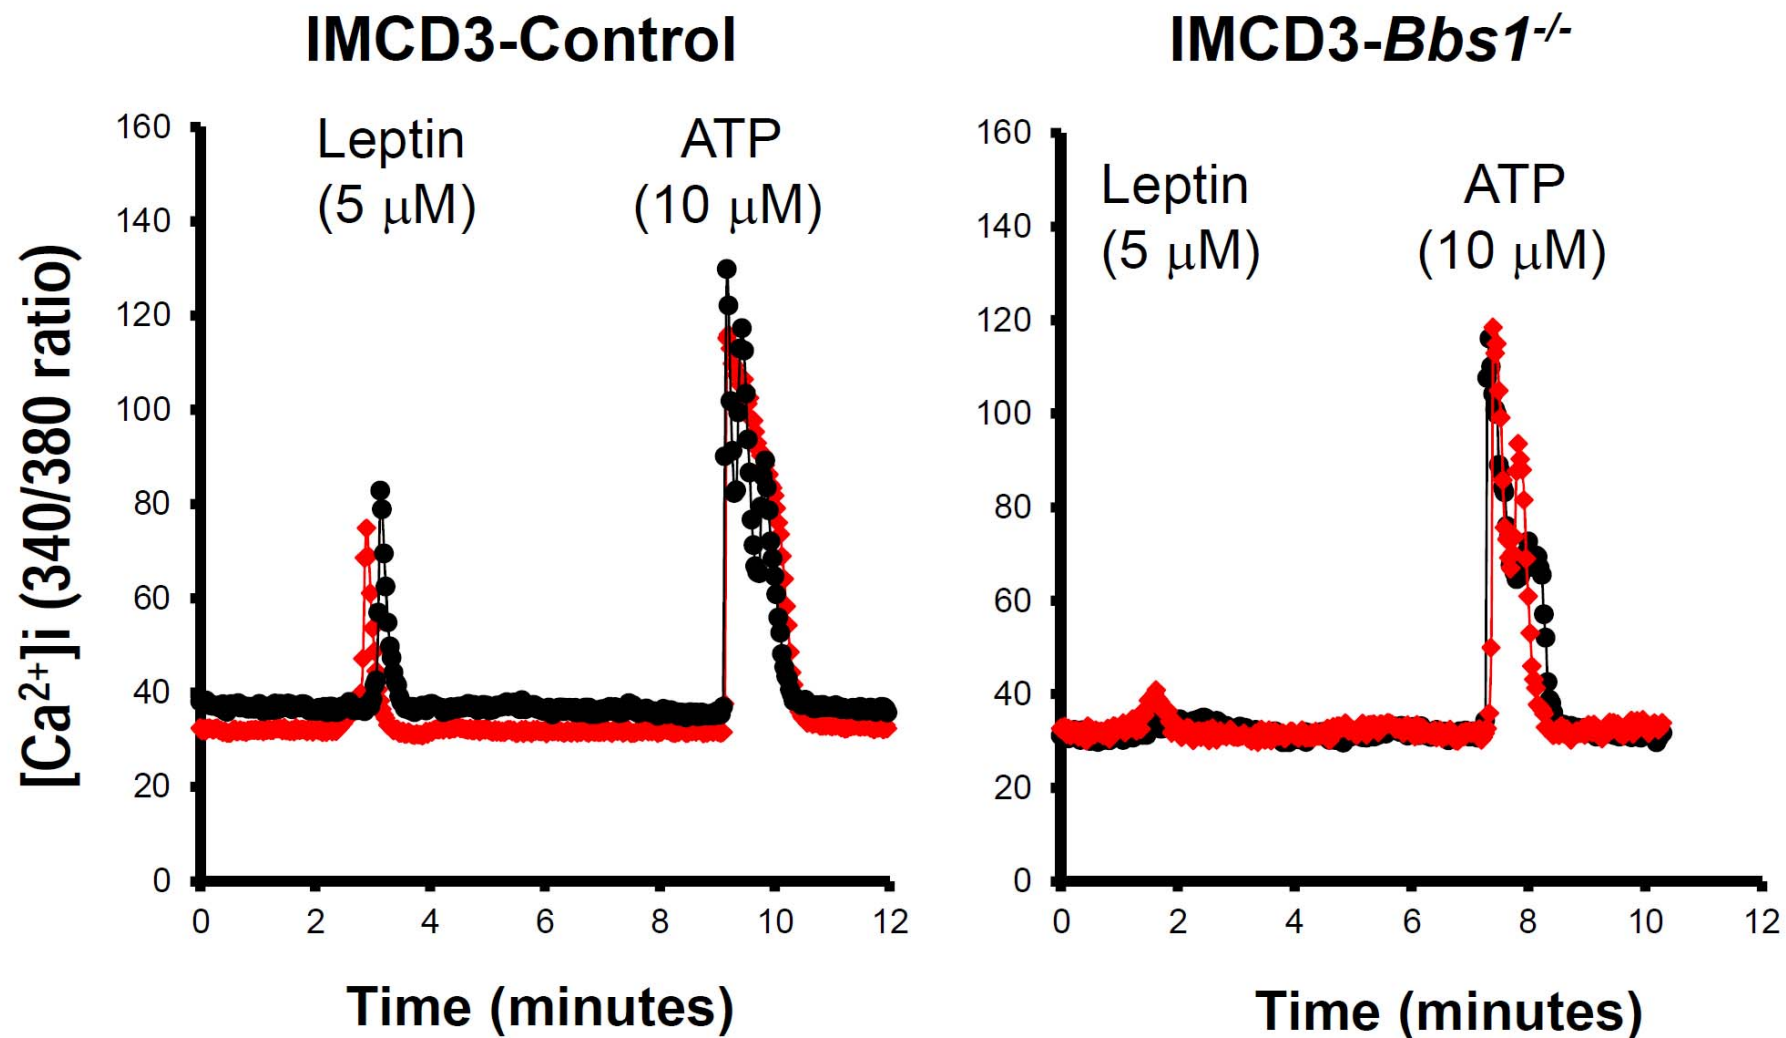



SUPPLEMENTARY DATA

**Supplementary Figure S8.** BBSome proteins interacts with 5-HT<sub>2C</sub>R in the late endosome. (A) BBS7 (red) colocalizes with markers of the late endosome: CD63 (green) or Rab7-GTP (green). (B) Silencing *Bbs2* gene expression promotes BBS7 (red) and 5-HT<sub>2C</sub>R (green) interaction in late endosome marked with CD63 (blue) in HEK 293 cells. Scale bar: 10 μm.

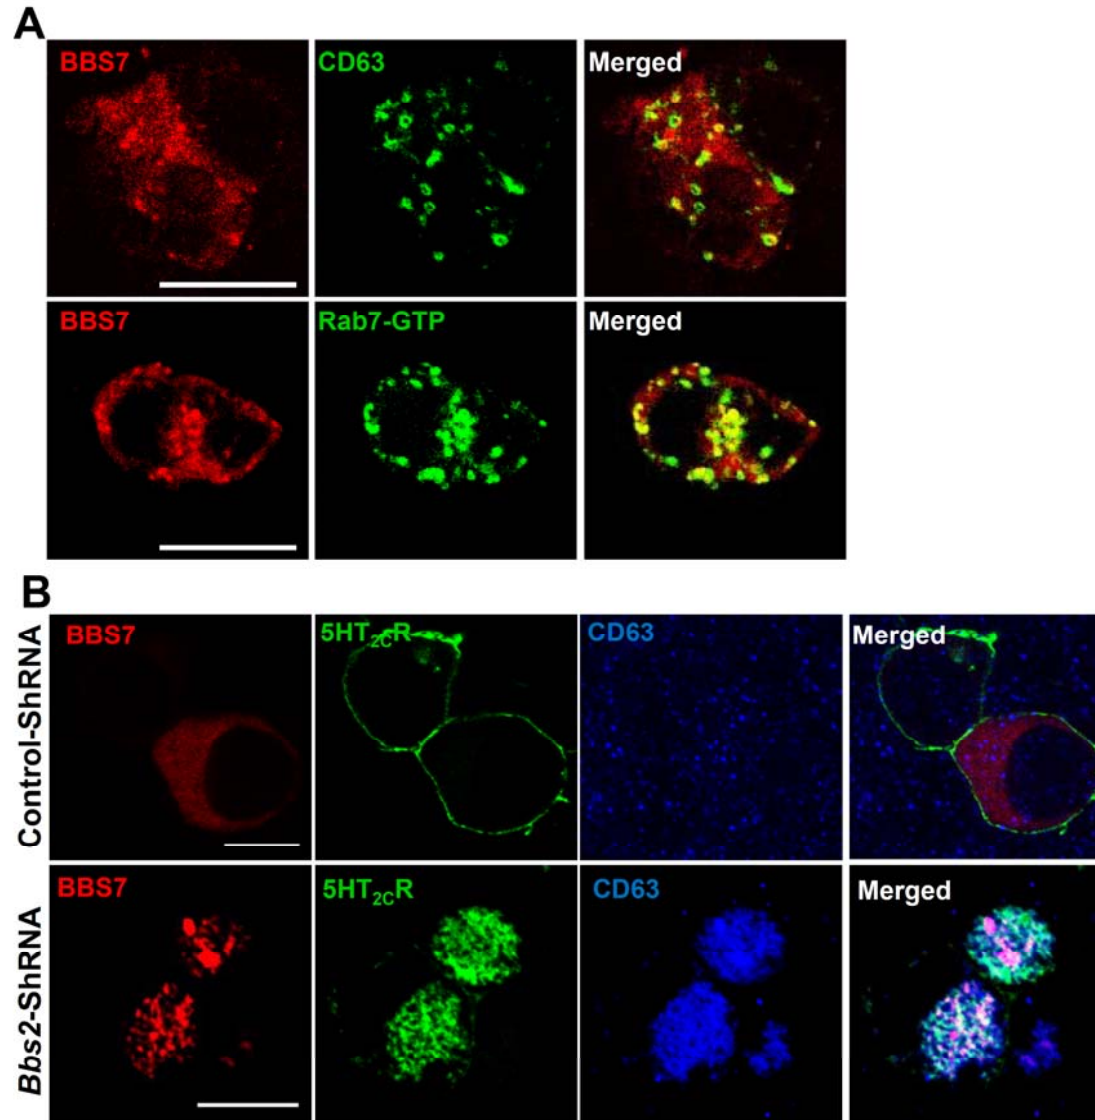

SUPPLEMENTARY DATA

**Supplementary Table S1.** Primer sequences used.

| Name                                             | Sense (5'-3')             | Anti-sense (5'-3')       |
|--------------------------------------------------|---------------------------|--------------------------|
| <u>Genotyping</u>                                |                           |                          |
| <i>Cre</i>                                       | ACCTGAAGATGTTGCGCATTATCT  | ACCGTCAGTACGTGAGATATCTT  |
| <i>Bbs1</i>                                      | ACATCCACACCTTCTCCTCCT     | GCCTACCTTGTACTIONCCCATC  |
| <u>Hypothalamic gene expression</u>              |                           |                          |
| S18                                              | ACTGCCATTAAGGGCGTGG       | CCATCCTTCACATCCTTCTG     |
| AgRP                                             | CAGAAGCTTTGGCGGAGGT       | AGGACTCGTGCAGCCTTACAC    |
| NPY                                              | TCAGACCTCTTAATGAAGGAAAGCA | GAGAACAAGTTTCATTTCCCATCA |
| POMC                                             | CTGCTTCAGACCTCCATAGATGTG  | CAGCGAGAGGTGAGTTTTGC     |
| <u>Generation of <i>Bbs1</i> knock-out cells</u> |                           |                          |
| sgRNA                                            | CCTTTGAGCACCTTCAGGCG      |                          |
| <i>Bbs1</i>                                      | ACTGCCATTAAGGGTGTGG       | CCATCCTTTACATCCTTCTG     |
